# Supplementary material for: Catalytic decomposition of hydrazine nitrate and hydroxylamine nitrate in radioactive nitric acid waste liquid using Ru/AC catalyst
Source: Royal Society of Chemistry journal article supplement (doi:10.1039/d4nj00916a), 2024-01-01
Supplement: d4nj00916a1.pdf [file d4nj00916a1.pdf]

## Electronic Supplementary Information

### Catalytic decomposition of hydrazine nitrate and hydroxylamine nitrate in radioactive nitric acid waste liquid using Ru/AC catalyst

Baole Li,\* Deyan Yu, Zhi Cao, Qi Chen, Chen Zuo, Tiansheng He, Taihong Yan, Weifang Zheng\*

*Department of Radiochemistry, China Institute of Atomic Energy, Beijing 102413, China*

*Baole Li: [2979849369@qq.com](mailto:2979849369@qq.com), Weifang Zheng: [wfazh@ciae.ac.cn](mailto:wfazh@ciae.ac.cn)*

### List of Contents

|                                                                                                                       |    |
|-----------------------------------------------------------------------------------------------------------------------|----|
| (1) Determination of HAN concentration                                                                                | S2 |
| (2) Determination of HN concentration                                                                                 | S3 |
| (3) The influence of catalyst dosage on the reaction time for the complete decomposition of HAN and HN                | S4 |
| (4) The influence of reaction temperature on the reaction time for the complete decomposition of HAN and HN           | S5 |
| (5) The influence of HNO <sub>3</sub> concentration on the reaction time for the complete decomposition of HAN and HN | S6 |
| (6) The influence of HAN concentration on the reaction time for the complete decomposition of HAN and HN              | S7 |
| (7) The influence of HN concentration on the reaction time for the complete decomposition of HAN and HN               | S8 |

### (1) Determination of HAN concentration

The concentration of HAN was determined using ultraviolet-visible spectrophotometry. The hydroxylamine exhibits the ability to effectively reduce  $\text{Fe}^{3+}$  ions to  $\text{Fe}^{2+}$  ions in solution. In a pH range of 2-9, o-phenanthrene undergoes a colour reaction with  $\text{Fe}^{2+}$  ions. This reaction demonstrates remarkable selectivity and yields a highly stable orange-red complex, exhibiting maximum absorption at 510 nm (as depicted in Fig. S1). In the range of  $10^{-4}$ - $10^{-3}$  mol/L, the standard curve of HAN concentration and absorbance are shown in Fig. S2. By utilizing this colour reaction, trace amounts of HAN can be accurately quantified through spectrophotometry.

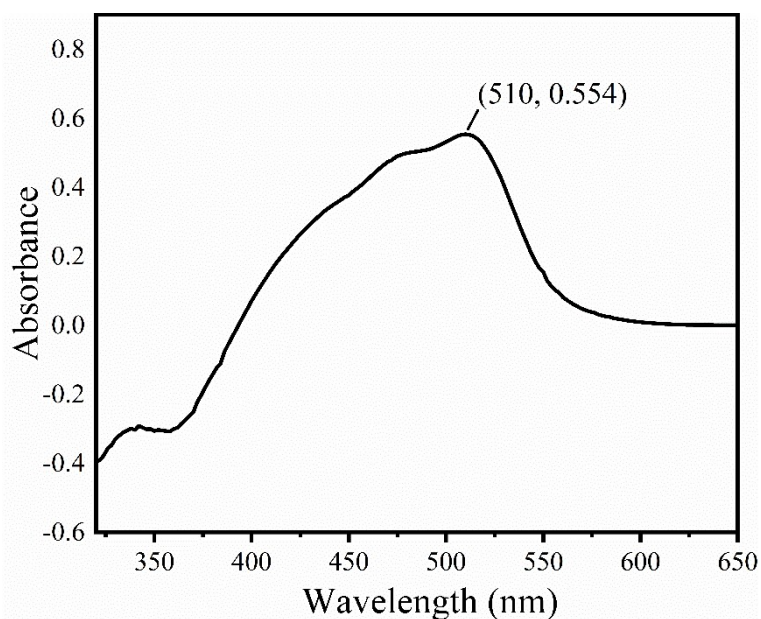

Fig. S1 Full spectrum scan image of HAN color reaction absorbance.

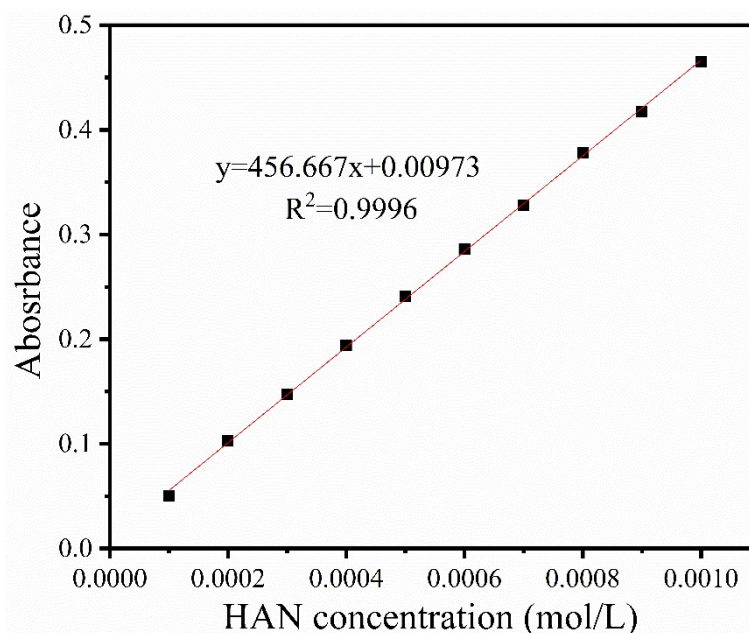

Fig. S2 The standard curve of HAN concentration and absorbance.

## (2) Determination of HN concentration

The concentration of HN was determined using ultraviolet-visible spectrophotometry. Under acidic conditions, hydrazine undergoes a colour reaction with p-dimethylaminobenzaldehyde. The maximum absorbance was measured at 457 nm, as depicted in Fig. S3. And the concentration of hydrazine exhibits proportionality to the measured absorbance within a specific range. In the range of  $10^{-4}$ - $10^{-3}$  mol/L, the standard curve of HN concentration and absorbance are shown in Fig. S4. By utilizing this colour reaction, trace amounts of HN can be accurately quantified through spectrophotometry.

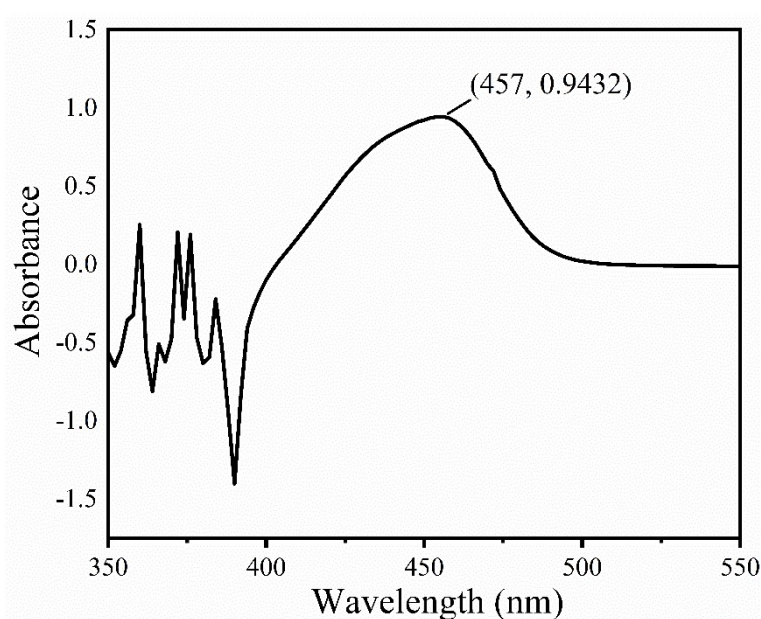

Fig. S3 Full spectrum scan image of HN color reaction absorbance.

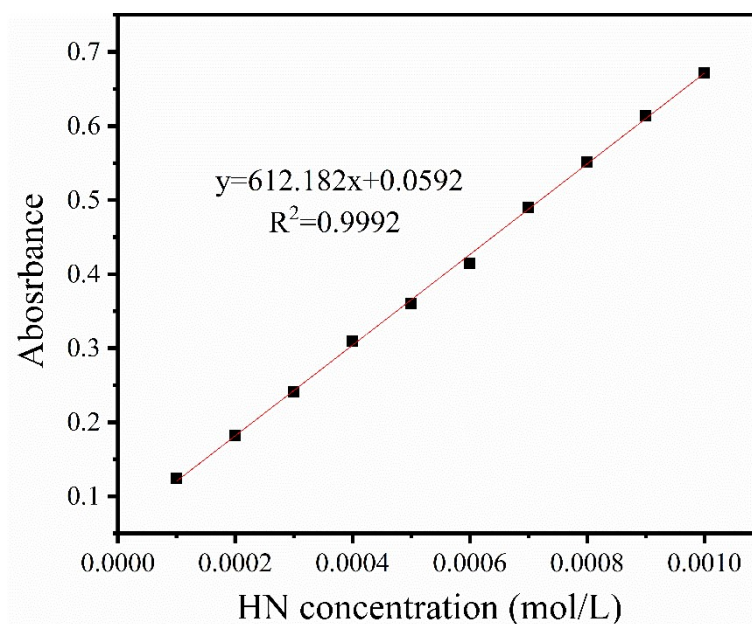

Fig. S4 The standard curve of HN concentration and absorbance.

**(3) The influence of catalyst dosage on the reaction time for the complete decomposition of HAN and HN**

Table S1 The influence of catalyst dosage on the reaction time for the complete decomposition of HAN and HN

| Entry | Catalyst dosage (g) | Reaction time (min) | HAN decomposition rate (%) | HN decomposition rate (%) |
|-------|---------------------|---------------------|----------------------------|---------------------------|
| 1     | 0.5                 | 10                  | 2.59                       | 14.15                     |
|       |                     | 30                  | 31.63                      | 56.13                     |
|       |                     | 50                  | 51.01                      | 81.19                     |
|       |                     | 70                  | 70.54                      | 96.47                     |
|       |                     | 90                  | 99.99                      | 99.99                     |
| 2     | 1.5                 | 10                  | 11.85                      | 44.85                     |
|       |                     | 30                  | 51.59                      | 80.94                     |
|       |                     | 50                  | 83.47                      | 98.26                     |
|       |                     | 55                  | 99.99                      | 99.99                     |
| 3     | 2.5                 | 5                   | 8.34                       | 26.81                     |
|       |                     | 15                  | 43.99                      | 78.85                     |
|       |                     | 25                  | 75.15                      | 96.33                     |
|       |                     | 35                  | 99.99                      | 99.99                     |
| 4     | 3.5                 | 10                  | 33.66                      | 70.28                     |
|       |                     | 20                  | 72.21                      | 95.41                     |
|       |                     | 29                  | 99.99                      | 99.99                     |
| 5     | 5.0                 | 5                   | 24.96                      | 43.19                     |
|       |                     | 15                  | 73.31                      | 96.47                     |

---

|  |    |       |       |
|--|----|-------|-------|
|  | 25 | 99.99 | 99.99 |
|--|----|-------|-------|

---

**(4) The influence of reaction temperature on the reaction time for the complete decomposition of HAN and HN**

Table S2 The influence of reaction temperature on the reaction time for the complete decomposition of HAN and HN

| Entry | Temperature (°C) | Reaction time (min) | HAN decomposition rate (%) | HN decomposition rate (%) |
|-------|------------------|---------------------|----------------------------|---------------------------|
| 1     | 60               | 10                  | 5.08                       | 8.12                      |
|       |                  | 40                  | 30.71                      | 56.77                     |
|       |                  | 70                  | 55.42                      | 83.92                     |
|       |                  | 100                 | 72.53                      | 96.08                     |
|       |                  | 120                 | 99.99                      | 99.99                     |
| 2     | 70               | 10                  | 7.00                       | 20.57                     |
|       |                  | 30                  | 40.05                      | 63.84                     |
|       |                  | 50                  | 62.23                      | 90.56                     |
|       |                  | 80                  | 99.99                      | 99.99                     |
| 3     | 80               | 5                   | 8.34                       | 26.81                     |
|       |                  | 15                  | 43.99                      | 78.85                     |
|       |                  | 25                  | 75.15                      | 96.33                     |
|       |                  | 35                  | 99.99                      | 99.99                     |
| 4     | 90               | 10                  | 30.80                      | 55.63                     |
|       |                  | 20                  | 60.95                      | 96.36                     |
|       |                  | 30                  | 99.99                      | 99.99                     |

**(5) The influence of HNO<sub>3</sub> concentration on the reaction time for the complete decomposition of HAN and HN**

Table S3 The influence of HNO<sub>3</sub> concentration on the reaction time for the complete decomposition of HAN and HN

| Entry | HNO <sub>3</sub> concentration (mol/L) | Reaction time (min) | HAN decomposition rate (%) | HN decomposition rate (%) |
|-------|----------------------------------------|---------------------|----------------------------|---------------------------|
| 1     | 0.8                                    | 10                  | 21.12                      | 51.87                     |
|       |                                        | 20                  | 49.38                      | 85.87                     |
|       |                                        | 30                  | 74.09                      | 98.26                     |
|       |                                        | 40                  | 91.34                      | 99.91                     |
|       |                                        | 45                  | 99.99                      | 99.99                     |
| 2     | 1.0                                    | 5                   | 8.34                       | 26.81                     |
|       |                                        | 15                  | 43.99                      | 78.85                     |
|       |                                        | 25                  | 75.15                      | 96.33                     |
|       |                                        | 35                  | 99.99                      | 99.99                     |
| 3     | 1.2                                    | 5                   | 9.16                       | 27.78                     |
|       |                                        | 15                  | 46.36                      | 83.48                     |
|       |                                        | 25                  | 77.97                      | 97.29                     |
| 4     | 1.4                                    | 33                  | 99.99                      | 99.99                     |
|       |                                        | 5                   | 11.21                      | 29.98                     |
|       |                                        | 15                  | 55.06                      | 86.14                     |
| 5     | 1.6                                    | 25                  | 89.35                      | 99.63                     |
|       |                                        | 28                  | 99.99                      | 99.99                     |
|       |                                        | 5                   | 13.58                      | 31.12                     |
| 5     | 1.6                                    | 15                  | 57.83                      | 88.35                     |
|       |                                        | 25                  | 99.99                      | 99.99                     |

**(6) The influence of HAN concentration on the reaction time for the complete decomposition of HAN and HN**

Table S4 The influence of HAN concentration on the reaction time for the complete decomposition of HAN and HN

| Entry | HAN concentration (mol/L) | Reaction time (min) | HAN decomposition rate (%) | HN decomposition rate (%) |
|-------|---------------------------|---------------------|----------------------------|---------------------------|
| 1     | 0.1                       | 11                  | 28.01                      | 65.63                     |
|       |                           | 20                  | 54.64                      | 88.89                     |
|       |                           | 30                  | 78.07                      | 99.35                     |
|       |                           | 38                  | 99.99                      | 99.99                     |
| 2     | 0.2                       | 5                   | 2.45                       | 23.09                     |
|       |                           | 15                  | 40.90                      | 76.23                     |
|       |                           | 25                  | 69.76                      | 97.57                     |
|       |                           | 36                  | 99.99                      | 99.99                     |
| 3     | 0.3                       | 5                   | 8.34                       | 26.81                     |
|       |                           | 15                  | 43.99                      | 78.85                     |
|       |                           | 25                  | 75.15                      | 96.33                     |
|       |                           | 35                  | 99.99                      | 99.99                     |
| 4     | 0.4                       | 8                   | 15.28                      | 42.49                     |
|       |                           | 15                  | 40.79                      | 78.31                     |
|       |                           | 25                  | 73.43                      | 98.73                     |
|       |                           | 35                  | 99.99                      | 99.99                     |
| 5     | 0.5                       | 5                   | 4.67                       | 27.82                     |
|       |                           | 15                  | 42.37                      | 82.29                     |
|       |                           | 25                  | 74.36                      | 99.05                     |
|       |                           | 34                  | 99.99                      | 99.99                     |



**(7) The influence of HN concentration on the reaction time for the complete decomposition of HAN and HN**

Table S5 The influence of HN concentration on the reaction time for the complete decomposition of HAN and HN

| Entry | HN concentration (mol/L) | Reaction time (min) | HAN decomposition rate (%) | HN decomposition rate (%) |
|-------|--------------------------|---------------------|----------------------------|---------------------------|
| 1     | 0.06                     | 6                   | 25.24                      | 54.65                     |
|       |                          | 10                  | 42.42                      | 77.37                     |
|       |                          | 18                  | 88.22                      | 98.93                     |
|       |                          | 24                  | 99.99                      | 99.99                     |
| 2     | 0.08                     | 5                   | 10.19                      | 32.60                     |
|       |                          | 15                  | 54.49                      | 88.01                     |
|       |                          | 25                  | 88.57                      | 99.20                     |
| 3     | 0.10                     | 30                  | 99.99                      | 99.99                     |
|       |                          | 5                   | 8.34                       | 26.81                     |
|       |                          | 15                  | 43.99                      | 78.85                     |
|       |                          | 25                  | 75.15                      | 96.33                     |
| 4     | 0.12                     | 35                  | 99.99                      | 99.99                     |
|       |                          | 5                   | 5.79                       | 28.00                     |
|       |                          | 15                  | 35.61                      | 72.97                     |
|       |                          | 30                  | 78.21                      | 96.71                     |
| 5     | 0.14                     | 47                  | 99.99                      | 99.99                     |
|       |                          | 10                  | 9.91                       | 39.76                     |
|       |                          | 30                  | 39.44                      | 79.88                     |
|       |                          | 50                  | 66.85                      | 96.79                     |
|       |                          | 74                  | 99.99                      | 99.99                     |
